# Supplementary material for: Characterization and Pathogenicity of Two Novel PRRSVs Recombined by NADC30-like and NADC34-like Strains in China
Source: MDPI journal article supplement (doi:10.3390/v14102174), 2022-09-30
Supplement: s1 [file s1]

## Supplementary Figure

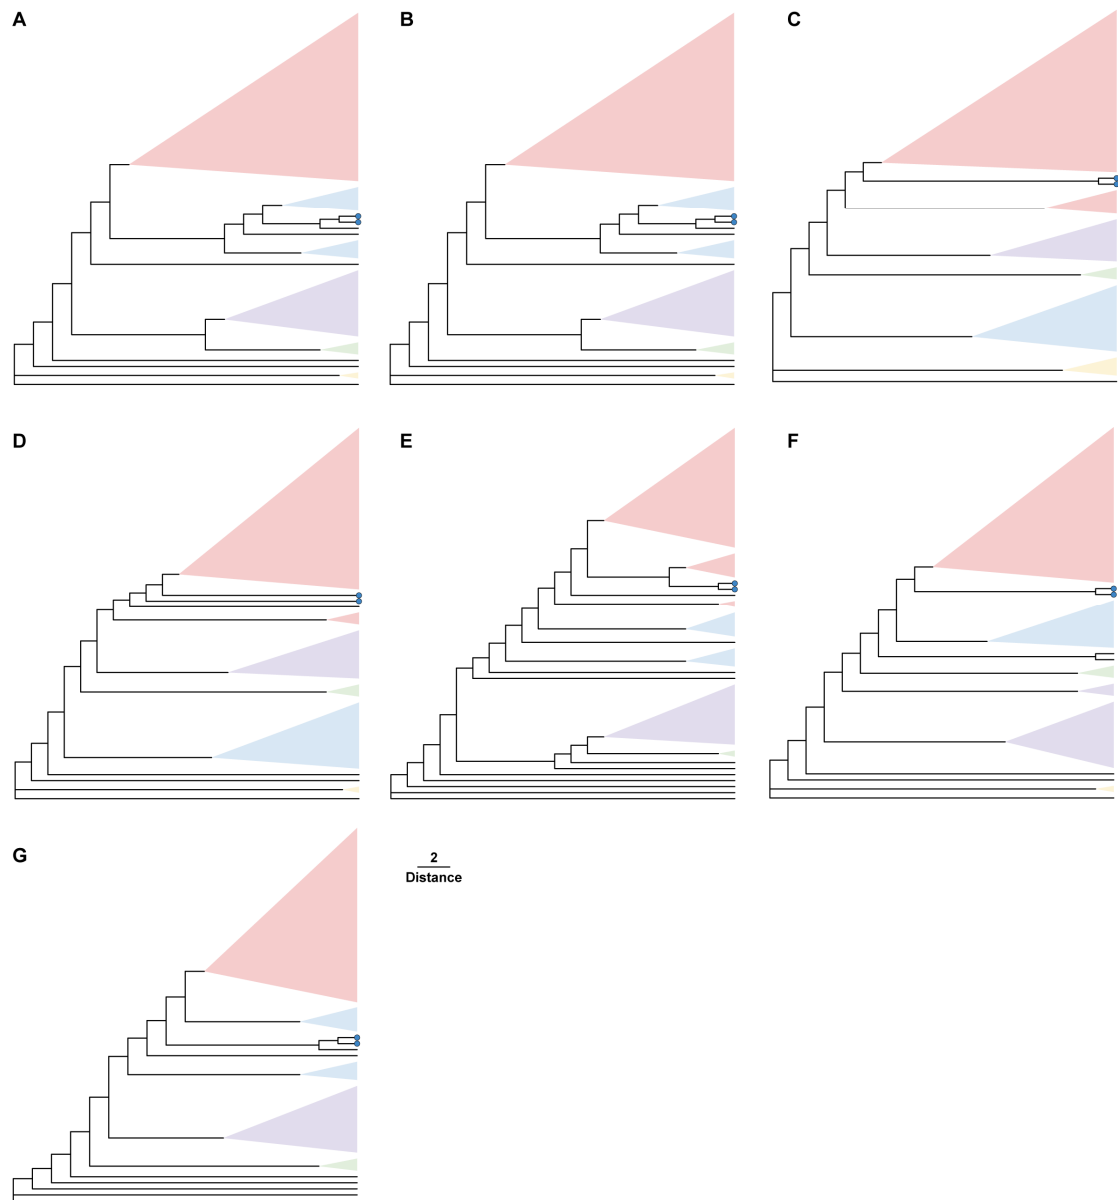

Supplementary Figure S1. (A-G): Phylogenetic trees constructed based on the ORF1a, 1b, 2, 3, 4, 6 and 7 gene of GD-H1 and GD-F1 strains with 61 reference PRRSV strains.
